# Supplementary material for: Co-Delivery of Imiquimod and Plasmid DNA via an Amphiphilic pH-Responsive Star Polymer that Forms Unimolecular Micelles in Water
Source: PubMed Central journal article supplement (PMC6431966; doi:10.3390/polym8110397), 2016-11-16
Supplement: polymers-08-00397-s001.pdf [file polymers-08-00397-s001.pdf]

# Supplementary Materials: Co-Delivery of Imiquimod and Plasmid DNA via an Amphiphilic pH-Responsive Star Polymer that Forms Unimolecular Micelles in Water

Wenjing Lin, Na Yao, Hongru Li, Samuel Hanson, Wenqing Han, Chun Wang and Lijuan Zhang

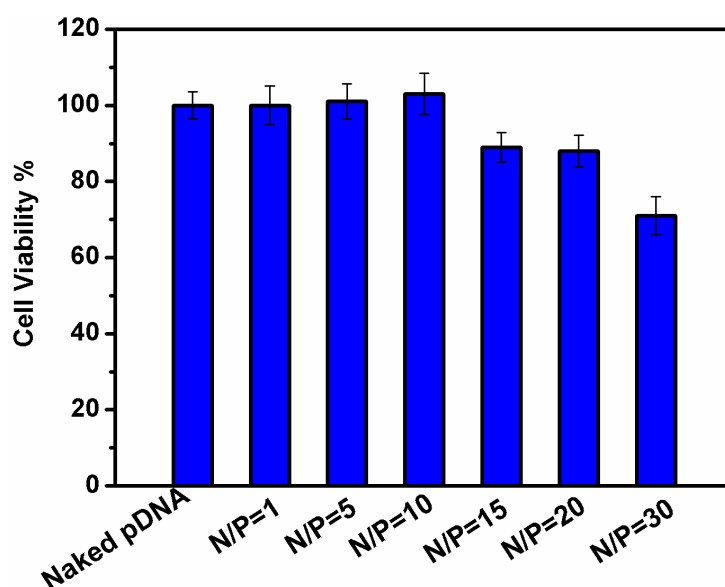

**Figure S1.** In vitro cytotoxicity of micelleplexes after 24 h incubation at different N:P ratios determined by MTT assay against DC 2.4 cells ( $n = 6$ ).
